# Supplementary material
Source: Research Square preprint supplement (doi:10.21203/rs.3.rs-9142567/v1)

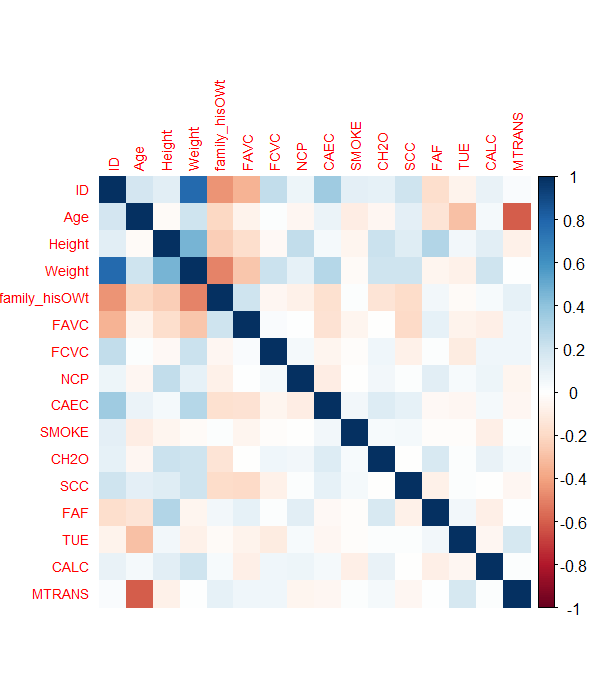


Figure 1 Correlation Heatmap


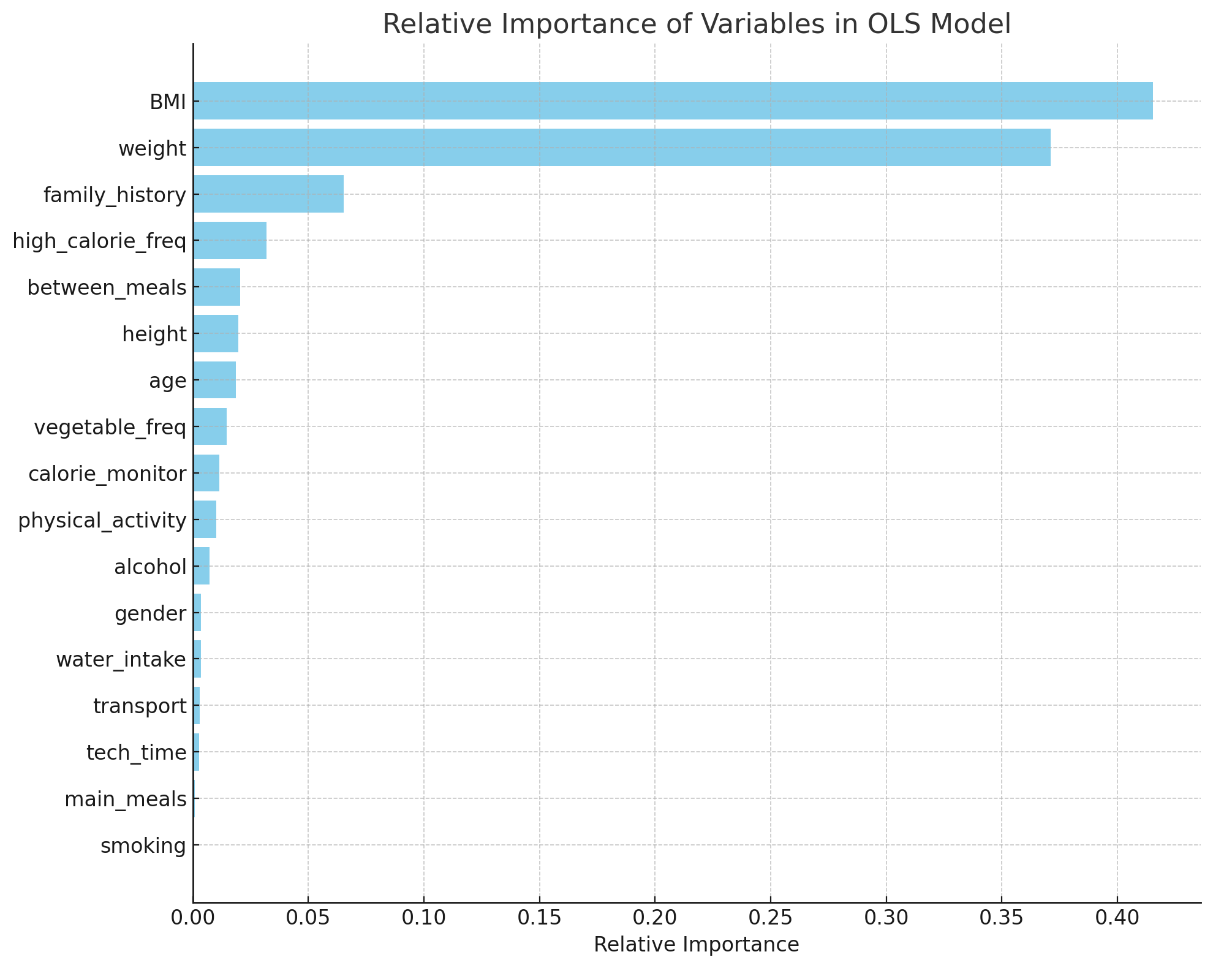


Figure 2 Relative importance of the variables in OLS model

Supplement: Supplementary file 1 [file ee8676f0fd0cd61cc386d9dc.docx]
